# Supplementary material
Source: publisher figshare collection journal article supplement (https://sage.figshare.com/ndownloader/files/14284331)
Supplement: Supplementary file 1 [file 14284331]

## Supplementary Tables

Table 1.

*Comparing room attributes and furniture.*

| Physical dimensions                          | Room A                                                                                                       | Room B                                                                        | Room C                                                              | Room D                                                                                     |
|----------------------------------------------|--------------------------------------------------------------------------------------------------------------|-------------------------------------------------------------------------------|---------------------------------------------------------------------|--------------------------------------------------------------------------------------------|
| Room Dimensions (LxW)                        | 10' x 12'                                                                                                    | 10' x 12'                                                                     | 10' x 12'                                                           | 10' x 12'                                                                                  |
| Exam table type                              | convertible                                                                                                  | traditional                                                                   | convertible                                                         | convertible                                                                                |
| Exam table position                          | Left wall, perpendicular angle                                                                               | Corner left, 45 degrees angle                                                 | Corner left, 45 degrees angle                                       | Corner left besides the door, 45 degrees angle                                             |
| Physician/consultation table                 | Movable, In middle of right wall, perpendicular angle, in front of patient, 90 degrees from caregiver chairs | Stationary, Parallel to right wall besides door, parallel to caregiver chairs | Movable on a small table with wireless keyboard                     | Stationary, In front of door, 45 degrees from exam chair, 90 degrees from caregiver chairs |
| Wall monitors                                | One above the consultation table                                                                             | None                                                                          | Three and in front of caregiver chairs, 45 degrees from exam tables | One above the consultation table                                                           |
| Distance between Exam table and monitor      | 6' – 10 1/8"                                                                                                 | 10' – 9 1/2"                                                                  | 6' – 3 11/16"                                                       | 8' – 6 7/8"                                                                                |
| Caregiver chairs                             | In front of door, middle of back wall                                                                        | Middle of Right wall                                                          | Middle of left wall                                                 | Corner of right wall                                                                       |
| Sink (hand sanitizer, paper dispenser, etc.) | Corner of right wall, parallel and visible to door                                                           | Corner of left wall, parallel and behind the door                             | Corner of front wall, parallel and visible from the door            | Corner of left - behind wall, parallel to door                                             |
| Door                                         | in middle, with storage space behind, in front of family chairs                                              | in middle, sink and cabinet behind                                            | at corner family chairs in front, sink adjacent                     | corner with chairs in front                                                                |
| Taxonomy                                     | Semi-Inclusive clinician controlled                                                                          | Exclusive                                                                     | Inclusive                                                           | Semi-Inclusive clinician controlled                                                        |

Table 2.

*Average behavioral durations (aggregated data for talking, gazing, and EHR-interaction) per room type.*

|           |   | <b>BDS</b>    | <b>BSS</b>    | <b>TBS</b>    |
|-----------|---|---------------|---------------|---------------|
| Room Type | A | 37.75 (28.79) | 11.76 (9.50)  | 67.56 (49.02) |
|           | B | 39.75 (29.98) | 11.65 (9.60)  | 69.56 (53.93) |
|           | C | 53.79 (36.43) | 15.34 (11.52) | 97.17 (73.41) |
|           | D | 37.55 (33.38) | 10.68 (8.49)  | 74.32 (69.25) |
| Total     |   | 41.71 (32.58) | 12.23 (9.85)  | 76.34 (61.90) |

Table 3.

*Average BDS durations of behaviors per examination stage across rooms.*

|                            | <b>Room</b> | <b>Talking</b> | <b>Gazing</b> | <b>EHR-Interaction</b> |
|----------------------------|-------------|----------------|---------------|------------------------|
| BDS for MA Intake          | A           | 56.05          | 43.91         | 17.94                  |
|                            | B           | 46.01          | 41.76         | 20.87                  |
|                            | C           | 55.23          | 29.58         | 91.13                  |
|                            | D           | 46.77          | 29.28         | 14.01                  |
| BDS for MD Infor Gathering | A           | 29.42          | 39.65         | 15.06                  |
|                            | B           | 35.86          | 47.48         | 22.86                  |
|                            | C           | 45.54          | 42.86         | 40.38                  |
|                            | D           | 34.85          | 32.20         | 19.50                  |
| BDS for MD Exam            | A           | 56.57          | 28.54         | NA                     |
|                            | B           | 60.72          | 43.64         | NA                     |
|                            | C           | 75.22          | 59.77         | NA                     |
|                            | D           | 53.31          | 24.34         | NA                     |
| BDS for MD Diagnosis       | A           | 54.73          | 45.49         | 24.00                  |
|                            | B           | 44.64          | 41.23         | 27.01                  |
|                            | C           | 69.20          | 55.05         | 30.69                  |
|                            | D           | 68.10          | 55.93         | 16.33                  |

Table 4.

*Average BDS and BSS durations of interaction behaviors (gazing and talking) across rooms.*

|           |       | BSD           | BSS           |
|-----------|-------|---------------|---------------|
| Room Type | A     | 43.72 (29.73) | 13.98 (9.62)  |
|           | B     | 44.69 (31.61) | 13.84 (9.73)  |
|           | C     | 54.11 (32.69) | 17.84 (11.29) |
|           | D     | 44.77 (35.28) | 12.76 (8.17)  |
|           | Total | 46.54 (32.36) | 14.48 (9.80)  |

Table 5.

*Descriptive results for actor versus non-actor participants.*

|                         | Survey Participants (actor and non-actor users) |         | Non-Actor Survey Participants |         |
|-------------------------|-------------------------------------------------|---------|-------------------------------|---------|
|                         | Frequency                                       | Percent | Frequency                     | Percent |
| Physician               | 123                                             | 34.0    | 123                           | 49.2    |
| Medical Assistant       | 89                                              | 24.6    | 85                            | 34.0    |
| Adult Caregiver         | 54                                              | 14.9    | 0                             | 0       |
| Adult Patient           | 49                                              | 13.5    | 5                             | 2.0     |
| Pediatric Patient       | 12                                              | 3.3     | 5                             | 2.0     |
| Pediatric Family Member | 35                                              | 9.7     | 32                            | 12.8    |
| Total                   | 362                                             | 100.0   | 250                           | 100.0   |

Table 6.

*One-way ANOVA analysis on satisfaction with exam room features.*

| <b>Satisfaction Rating</b>  | <b>RA Mean (SD)</b> | <b>RB Mean (SD)</b> | <b>RC Mean (SD)</b> | <b>RD Mean (SD)</b> | <b>F</b> |
|-----------------------------|---------------------|---------------------|---------------------|---------------------|----------|
| Monitor sharing             | 4.03 (2.83)         | 2.66 (2.5)          | 4.96 (2.47)         | 4.22 (2.86)         | 14.19*** |
| Monitor information viewing | 4.95 (2.6)          | 3.54 (2.7)          | 4.84 (2.44)         | 4.76 (2.68)         | 6.58***  |
| Computer monitors           | 5.72 (1.61)         | 4.90 (2.13)         | 4.35 (2.59)         | 5.86 (1.49)         | 10.16*** |
| Wall-mounted monitor        | 4.58 (2.7)          | .63 (1.8)           | 4.81 (2.42)         | 4.71 (2.73)         | 76.48*** |
| Exam table                  | 4.83 (2.16)         | 4.30 (2.1)          | 5.61 (1.60)         | 5.65 (1.52)         | 12.13*** |
| Physician workstation       | 4.48 (2.36)         | 4.50 (2.14)         | 4.31 (2.39)         | 5.60 (1.83)         | 6.61***  |

\*\*\*  $p < .001$

Table 7.

*Significant difference Satisfaction ratings of non-actor survey across rooms.*

|           |                       | A           | B           | C           | D           | F       |
|-----------|-----------------------|-------------|-------------|-------------|-------------|---------|
|           |                       | M (SD)      |             |             |             |         |
| MD        | Computer Monitor      | 6.10 (1.03) | 5.33 (1.69) | 3.81 (2.39) | 6.32 (0.77) | 12.22** |
|           | Wall-mounted monitor  | 4.29 (3.04) | 0.39 (1.41) | 5.03 (2.01) | 4.93 (2.56) | 24.38** |
|           | Physician workstation | 5.29 (2.04) | 4.94 (1.87) | 4.55 (1.86) | 6.07 (1.04) | 3.75*   |
|           | Curtain               | 1.48 (2.13) | 3.00 (2.87) | 1.68 (2.27) | 4.07 (2.65) | 5.79**  |
| MA        | Computer Monitor      | 5.86 (1.28) | 5.28 (2.14) | 4.17 (2.46) | 5.71 (1.59) | 3.22*   |
|           | Wall-mounted monitor  | 3.90 (2.77) | 1.06 (2.18) | 3.75 (2.57) | 3.43 (2.98) | 3.4*    |
|           | Curtain               | 2.32 (2.63) | 2.39 (2.91) | 2.48 (2.86) | 5.67 (1.68) | 8.207** |
|           | Linen Hamper          | 1.68 (2.30) | 2.22 (2.98) | 4.17 (2.84) | 3.95 (2.61) | 3.94*   |
|           | Exam Table            | 4.23 (2.29) | 4.22 (1.99) | 5.83 (1.50) | 5.43 (1.25) | 5.15**  |
| Caregiver | Computer Monitor      | 5.75 (1.16) | 3.43 (2.30) | 6.10 (0.88) | 6.00 (1.26) | 5.65**  |
|           | Wall-mounted monitor  | 5.75 (1.16) | 1.00 (2.65) | 5.00 (2.79) | 5.29 (2.50) | 6.14**  |
|           | Physician workstation | 5.50 (1.07) | 3.29 (2.50) | 4.56 (2.51) | 6.57 (0.79) | 3.77*   |

\*p &lt; .05. \*\*p &lt; .01.

Table 8.

*Significant survey ratings between real and actor family members.*

|                  | Real          | Actor         | F     |
|------------------|---------------|---------------|-------|
|                  | <i>M (SD)</i> | <i>M (SD)</i> |       |
| Computer monitor | 5.39 (1.74)   | 4.21 (2.66)   | 4.89* |
| Curtain          | 2.46 (2.69)   | 3.63 (2.49)   | 4.21* |
| Diagnostic Set   | 4.70 (2.26)   | 3.10 (3.03)   | 6.58* |

\*p &lt; .05. \*\*p &lt; .01.



Table 9.

*Significant ratings of exam room features, within actor and real family participants.*

|       |                  | A             | B              | C              | D              | F      |
|-------|------------------|---------------|----------------|----------------|----------------|--------|
|       |                  | <i>M (SD)</i> | <i>M (SD)</i>  | <i>M (SD)</i>  | <i>M (SD)</i>  |        |
| Real  | Computer monitor | 5.75 (1.16)   | 3.43<br>(2.30) | 6.10<br>(.88)  | 6.00<br>(1.26) | 5.65** |
|       | Curtain          | 2.38 (2.77)   | 1.86<br>(2.34) | 1.70<br>(2.79) | 4.29<br>(2.50) | 1.52   |
|       | Diagnostic Set   | 4.75 (2.19)   | 5.29<br>(2.50) | 5.00<br>(1.73) | 3.71<br>(2.87) | 0.62   |
| Actor | Computer monitor | 4.07 (2.67)   | 3.93<br>(2.43) | 4.33<br>(3.33) | 4.54<br>(2.30) | 0.137  |
|       | Curtain          | 2.14 (2.54)   | 4.60<br>(2.23) | 3.27<br>(2.40) | 4.54<br>(2.15) | 3.52*  |
|       | Diagnostic Set   | 3.62 (2.01)   | 2.60<br>(3.00) | 3.13<br>(3.23) | 3.15<br>(3.16) | .25    |

Table 10.

*Significant differences between genders across all participants.*

|                  | Female      | Male        | F      |
|------------------|-------------|-------------|--------|
|                  | M (SD)      | M (SD)      |        |
| Computer Monitor | 5.34 (1.99) | 4.75 (2.32) | 6.30*  |
| Chair            | 4.82 (2.57) | 4.20 (2.82) | 4.41*  |
| Glove dispenser  | 4.68 (2.64) | 3.87 (2.90) | 6.89** |
| Diagnostic Set   | 4.25 (2.69) | 3.60 (2.91) | 4.37*  |
| Soap dispenser   | 5.06 (2.50) | 4.33 (2.82) | 6.13*  |
| Sink             | 5.18 (2.08) | 4.69 (2.46) | 3.905* |
